# Supplementary material for: Diverse nature of femtosecond laser ablation of poly(L-lactide) and the influence of filamentation on the polymer crystallization behaviour
Source: PubMed Central journal article supplement (PMC6395729; doi:10.1038/s41598-019-39640-1), 2019-02-28
Supplement: 41598_2019_39640_MOESM1_ESM.pdf [file 41598_2019_39640_MOESM1_ESM.pdf]

## Supplementary Information

### Diverse nature of femtosecond laser ablation of poly(L-lactide) and the influence of filamentation on the polymer crystallization behaviour

*Bogusz Stępak<sup>1\*</sup>, Małgorzata Gazińska<sup>2</sup>, Michał Nejbauer<sup>3</sup>, Yuriy Stepanenko<sup>3</sup>, Arkadiusz Antończak<sup>1</sup>*

<sup>1</sup>Laser and Fibre Electronics Group, Faculty of Electronics, <sup>2</sup>Department of Engineering and Technology of Polymers, Faculty of Chemistry, Wrocław University of Science and Technology, Wyb. Wyspiańskiego 27, 50-370 Wrocław, Poland, <sup>3</sup>Institute of Physical Chemistry, Polish Academy of Sciences, 01-224 Warsaw, Poland

\*bogusz.stepak@pwr.edu.pl

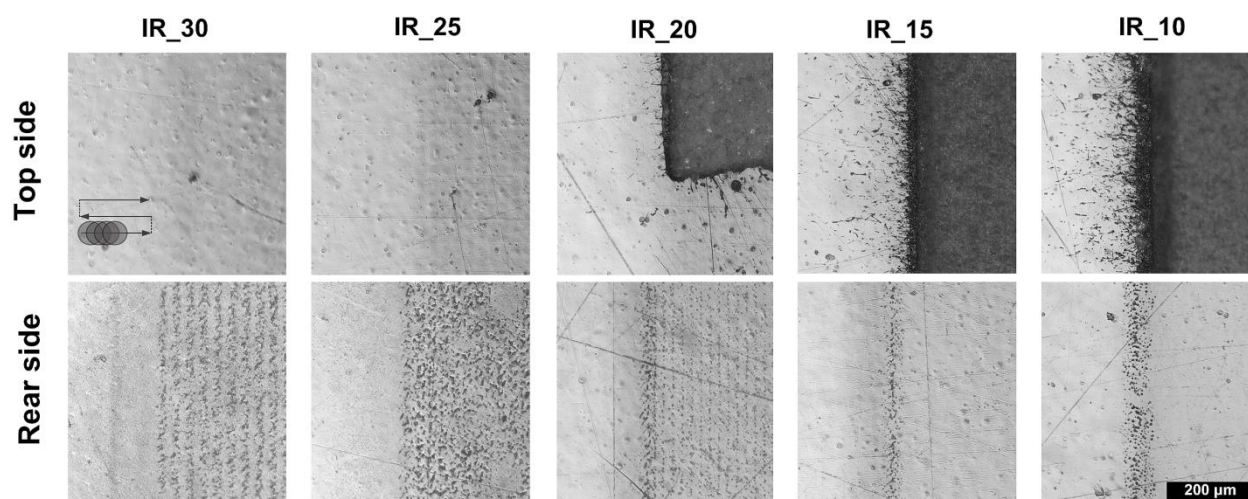

Supplementary Figure S1. Evolution of rear and top surface modification of the samples irradiated by 1030 nm wavelength. Scale bar is common for presented microscopic images.

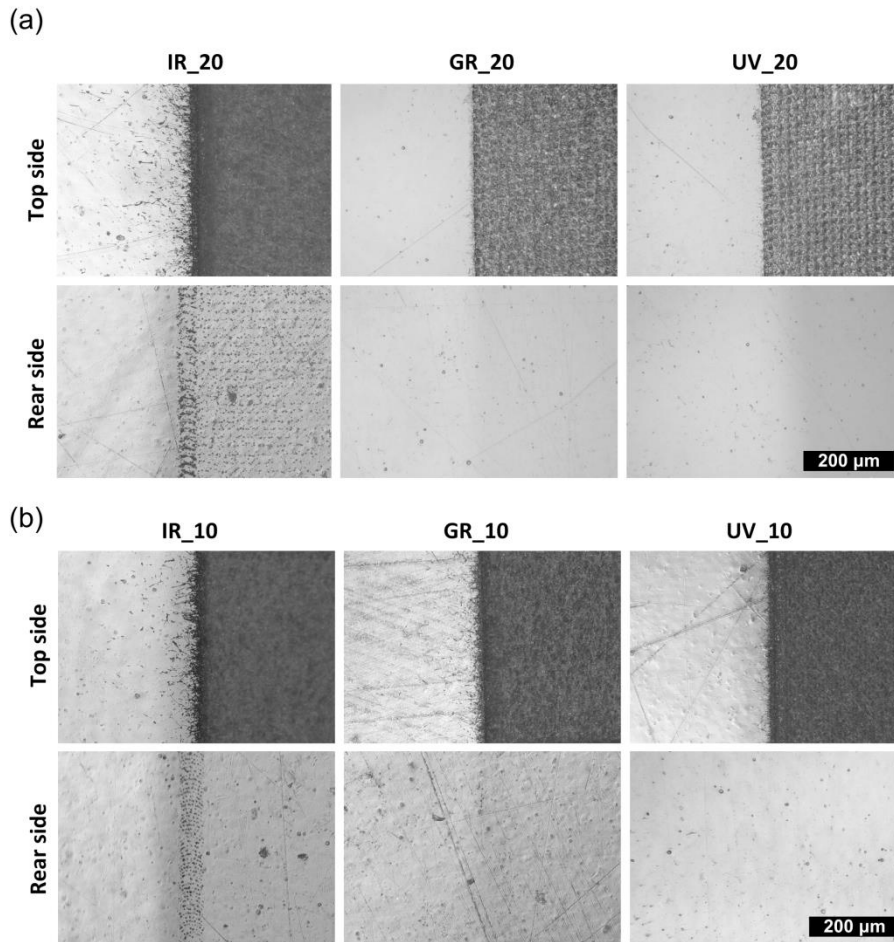

Supplementary Figure S2. Optical microscope images of the top and rear surfaces of the samples irradiated at three wavelengths with pulse spacing a) 20 μm and b) 10 μm.

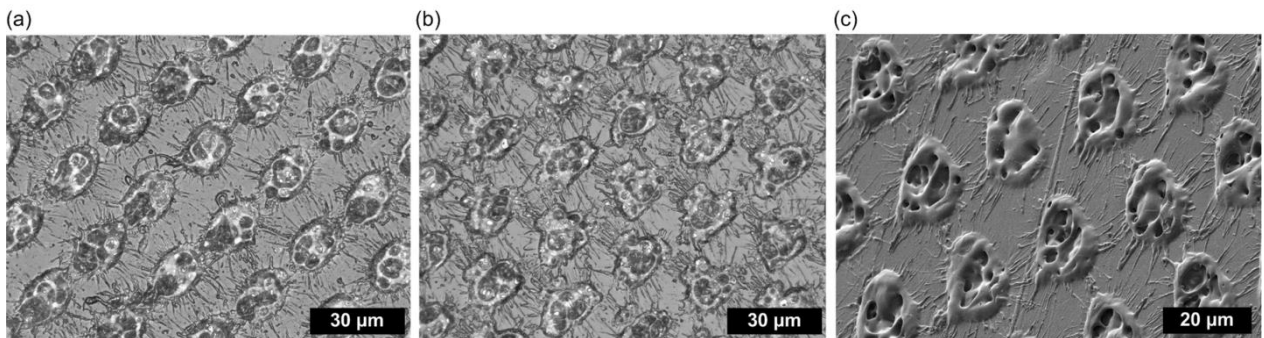

Supplementary Figure S3. The craters at the top surface of sample a) GR\_30 and b) UV\_30, c) SEM image of craters at the surface of UV\_30 sample

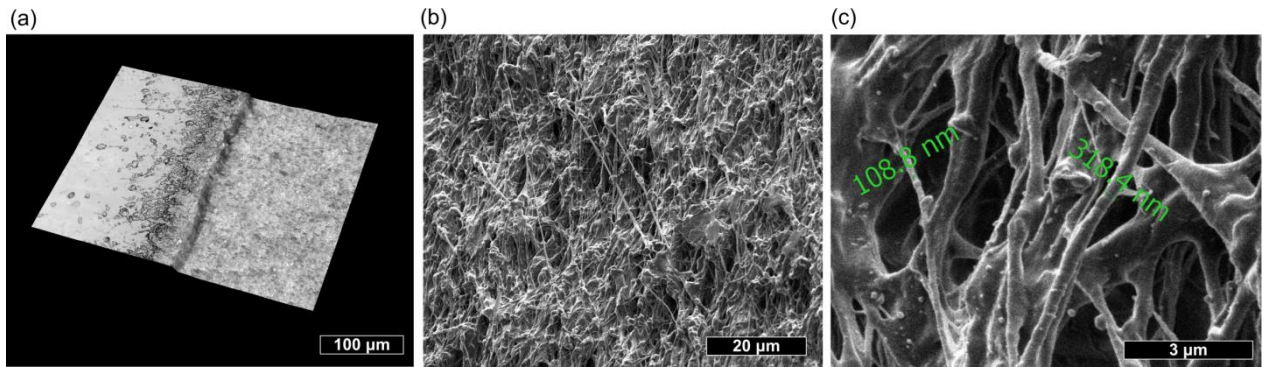

Supplementary Figure S4. The images of top ablated surface at 1030 nm wavelength and with low pulse spacing: a) optical microscope 3D image of the edge of ablated field, b) SEM image of the ablated surface, c) enlarged nanofiber formed during ablation of top surface

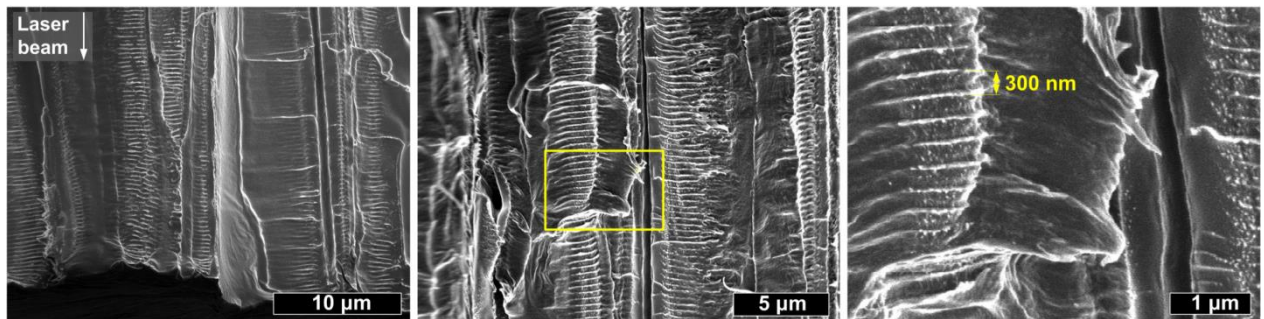

Supplementary Figure S5. Detailed cross-sectional SEM images of periodic nanostructures formed as a result of filament propagation inside PLLA induced by laser pulse at 1030 nm (sample IR\_30) presented in different scales

Supplementary Table S1. The thermal parameters of laser modified PLLA obtained based on the first heating DSC scan

| sample | $T_g$ [°C] | $T_{cc}$ [°C] | $\Delta H_{cc}$ [J/g] | $T_{\alpha'-\alpha}$ [°C] | $\Delta H_{\alpha'-\alpha}$ [J/g] | $T_m$ [°C] | $\Delta H_m$ [J/g] |
|--------|------------|---------------|-----------------------|---------------------------|-----------------------------------|------------|--------------------|
| REF    | 64.4       | 109.9         | <b>-36.6</b>          | 161.2                     | <b>-2.6</b>                       | 180.7      | 41.7               |
| IR_30  | 65.0       | 105.5         | <b>-25.3</b>          | 161.4                     | <b>-5.7</b>                       | 180.6      | 42.3               |
| IR_25  | 64.7       | 102.5         | <b>-28.2</b>          | 160.7                     | <b>-6.3</b>                       | 180.4      | 44.4               |
| IR_20  | 64.7       | 102.9         | <b>-21.0</b>          | 160.5                     | <b>-5.1</b>                       | 180.5      | 44.8               |
| IR_15  | 64.6       | 105.3         | <b>-21.2</b>          | 160.6                     | <b>-4.0</b>                       | 180.7      | 44.3               |
| IR_10  | 64.5       | 110.5         | <b>-33.5</b>          | 161.3                     | <b>-1.6</b>                       | 180.7      | 39.8               |
| GR_30  | 64.4       | 107.2         | <b>-28.4</b>          | 163.0                     | <b>-3.9</b>                       | 179.4      | 43.7               |
| GR_25  | 64.2       | 107.8         | <b>-28.3</b>          | 162.6                     | <b>-4.2</b>                       | 179.9      | 43.6               |
| GR_20  | 64.2       | 108.6         | <b>-26.6</b>          | 162.0                     | <b>-3.0</b>                       | 179.8      | 43.1               |
| GR_15  | 64.2       | 108.6         | <b>-25.7</b>          | 162.1                     | <b>-3.3</b>                       | 180.8      | 42.6               |
| GR_10  | 64.3       | 106.6         | <b>-39.5</b>          | 161.2                     | <b>-2.8</b>                       | 180.1      | 42.8               |
| UV_30  | 63.6       | 109.0         | <b>-27.8</b>          | 162.3                     | <b>-3.0</b>                       | 181.0      | 44.5               |
| UV_25  | 63.7       | 108.9         | <b>-29.1</b>          | 162.3                     | <b>-3.5</b>                       | 180.9      | 43.5               |
| UV_20  | 63.7       | 109.1         | <b>-22.7</b>          | 162.2                     | <b>-2.6</b>                       | 180.3      | 42.9               |
| UV_15  | 64.0       | 110.2         | <b>-21.6</b>          | 161.6                     | <b>-2.0</b>                       | 181.3      | 42.3               |
| UV_10  | 64.0       | 109.7         | <b>-37.2</b>          | 161.5                     | <b>-2.6</b>                       | 180.5      | 43.6               |

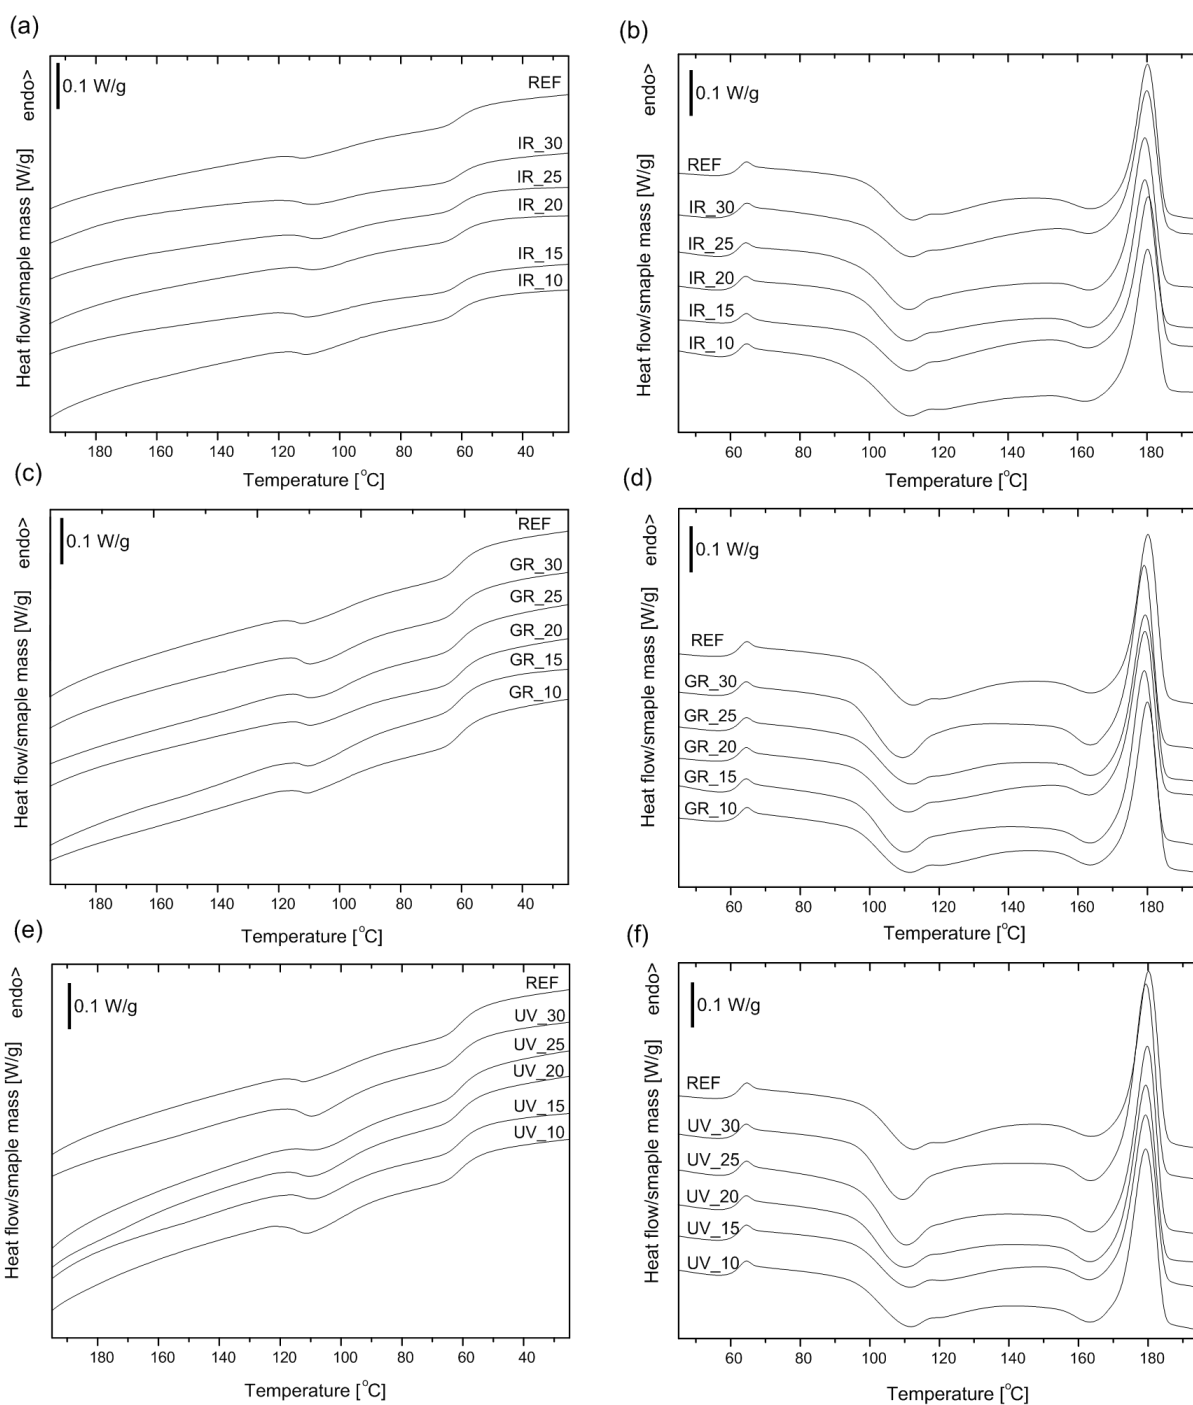

Supplementary Figure S6. The cooling (left) and 2<sup>nd</sup> heating (right) DSC curves of PLLA modified at 1030 nm (a, b), 515 nm (c, d) and 343 nm (e, f) wavelengths.

Supplementary Table S2. The thermal parameters of reference and 1030 nm, 515 nm and 343 nm laser modified PLLA samples estimated from the cooling DSC curves.

| sample | T <sub>g</sub> [°C] | T <sub>cc</sub> [°C] | ΔH <sub>cc</sub> [J/g] |
|--------|---------------------|----------------------|------------------------|
| REF    | 61.4                | 110.6                | -2.94                  |
| IR_30  | 61.2                | 107.3                | -3.53                  |
| IR_25  | 61.4                | 106.1                | -3.56                  |
| IR_20  | 61.1                | 106.6                | -2.92                  |
| IR_15  | 61.1                | 109.6                | -3.50                  |
| IR_10  | 61.0                | 109.5                | -3.51                  |
| GR_30  | 61.0                | 108.6                | -4.09                  |
| GR_25  | 61.0                | 106.2                | -3.53                  |
| GR_20  | 60.5                | 108.0                | -3.03                  |
| GR_15  | 61.7                | 108.8                | -3.45                  |
| GR_10  | 61.5                | 109.3                | -2.78                  |
| UV_30  | 60.4                | 108.5                | -4.86                  |
| UV_25  | 60.5                | 105.2                | -3.52                  |
| UV_20  | 60.6                | 107.6                | -4.52                  |
| UV_15  | 60.7                | 107.5                | -3.72                  |
| UV_10  | 61.0                | 110.0                | -5.24                  |

Supplementary Table S3. The thermal parameters of reference and 1030 nm, 515 nm and 343 nm laser modified PLLA samples estimated from the second heating DSC curves.

| sample | T <sub>g</sub> [°C] | T <sub>cc</sub> [°C] | ΔH <sub>cc</sub> [J/g] | T <sub>α'-α</sub> [°C] | T <sub>m</sub> [°C] | ΔH <sub>m</sub> [J/g] |
|--------|---------------------|----------------------|------------------------|------------------------|---------------------|-----------------------|
| REF    | 62.8                | 112.1                | -32.90                 | 162.5                  | 180.2               | 40.40                 |
| IR_30  | 63.0                | 111.8                | -40.08                 | 163.0                  | 179.9               | 40.51                 |
| IR_25  | 62.6                | 111.1                | -39.70                 | 162.8                  | 179.3               | 42.06                 |
| IR_20  | 62.6                | 111.0                | -39.44                 | 163.3                  | 179.4               | 39.86                 |
| IR_15  | 62.5                | 111.4                | -37.33                 | 162.7                  | 180.3               | 41.37                 |
| IR_10  | 62.9                | 111.3                | -33.99                 | 162.5                  | 180.2               | 36.67                 |
| GR_30  | 62.7                | 109.0                | -21.84                 | 163.1                  | 179.1               | 42.63                 |
| GR_25  | 62.8                | 111.6                | -35.00                 | 163.0                  | 179.3               | 42.35                 |
| GR_20  | 62.8                | 110.6                | -37.60                 | 163.0                  | 179.2               | 41.64                 |
| GR_15  | 62.7                | 109.8                | -33.40                 | 163.1                  | 179.1               | 41.87                 |
| GR_10  | 63.0                | 111.0                | -34.39                 | 162.8                  | 179.9               | 40.59                 |
| UV_30  | 62.8                | 109.1                | -25.10                 | 162.7                  | 179.4               | 44.99                 |
| UV_25  | 62.7                | 110.1                | -31.07                 | 163.1                  | 179.8               | 43.33                 |
| UV_20  | 62.8                | 109.6                | -32.57                 | 163.1                  | 179.3               | 42.25                 |
| UV_15  | 62.7                | 111.1                | -32.38                 | 162.8                  | 179.3               | 42.51                 |
| UV_10  | 62.7                | 111.1                | -30.10                 | 162.5                  | 179.3               | 43.89                 |

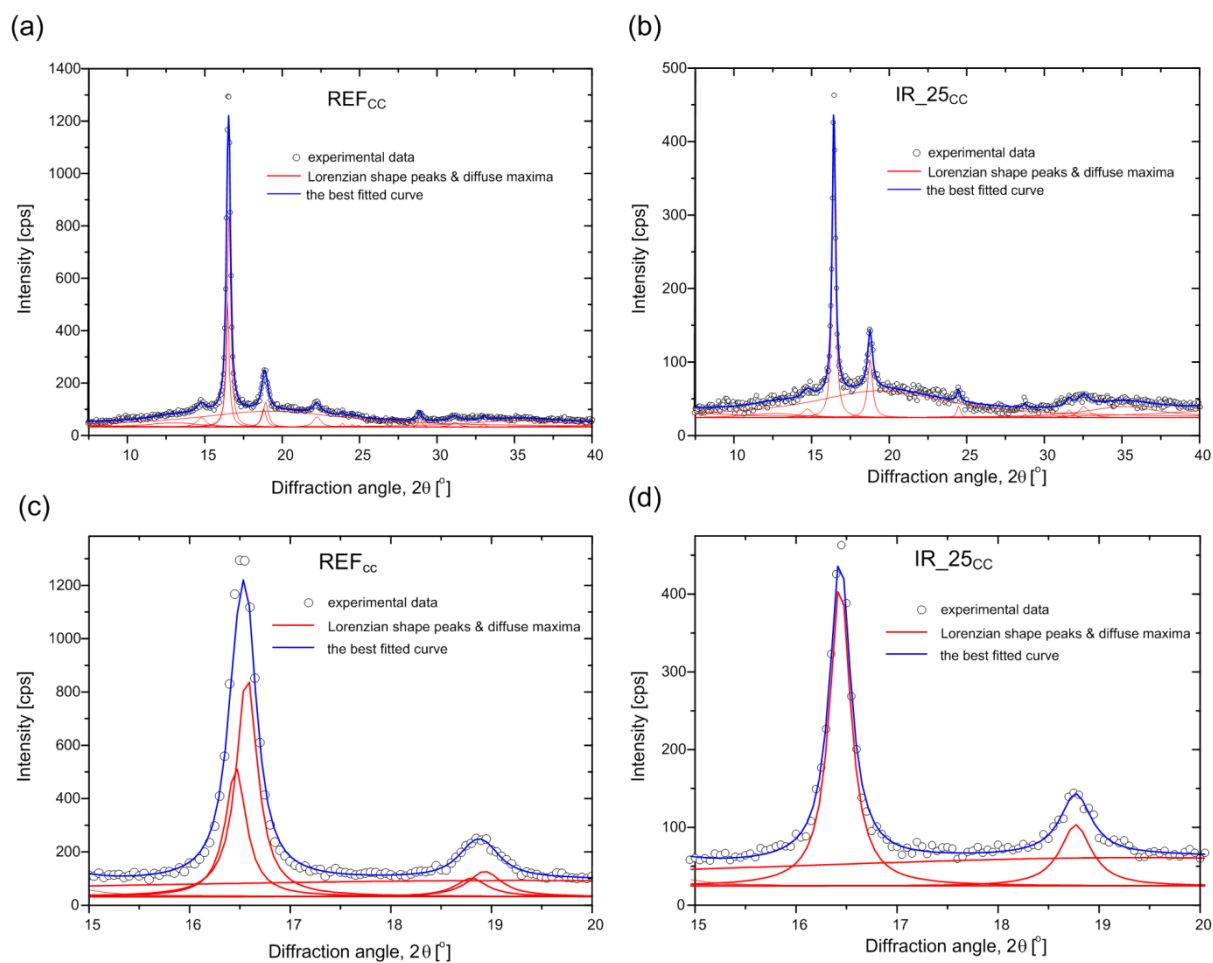

Supplementary Figure S7. Deconvolution of WAXD patterns into the diffraction peaks and diffusion maxima for nonisothermal crystallized reference PLLA and sample with filamentary modifications IR<sub>25</sub>: full diffraction patterns (a, b); close up of main peaks (c, d)

Supplementary Table S4. The thermal parameters of laser modified PLLA at 1030 nm after hydrolysis based on the first heating DSC scan

| sample           | T <sub>g</sub> [°C] | T <sub>cc</sub> [°C] | ΔH <sub>cc</sub> [J/g] | T <sub>α'-α</sub> [°C] | ΔH <sub>α'-α</sub> [J/g] | T <sub>m</sub> [°C] | ΔH <sub>m</sub> [J/g] |
|------------------|---------------------|----------------------|------------------------|------------------------|--------------------------|---------------------|-----------------------|
| REF              | 67.2                | 106.7                | -39.33                 | 161.8                  | -6.16                    | 180.1               | 44.27                 |
| IR <sub>30</sub> | 69.3                | 99.4                 | -28.28                 | 161.2                  | -6.81                    | 179.1               | 49.21                 |
| IR <sub>25</sub> | 69.0                | 96.7                 | -23.43                 | 161.0                  | -6.50                    | 179.0               | 50.43                 |
| IR <sub>20</sub> | 69.1                | 100.4                | -20.77                 | 160.6                  | -6.77                    | 179.1               | 48.32                 |
| IR <sub>15</sub> | 69.4                | 106.5                | -26.90                 | 161.9                  | -5.37                    | 179.9               | 45.80                 |
| IR <sub>10</sub> | 69.4                | 110.0                | -24.81                 | 162.2                  | -4.32                    | 180.3               | 43.38                 |

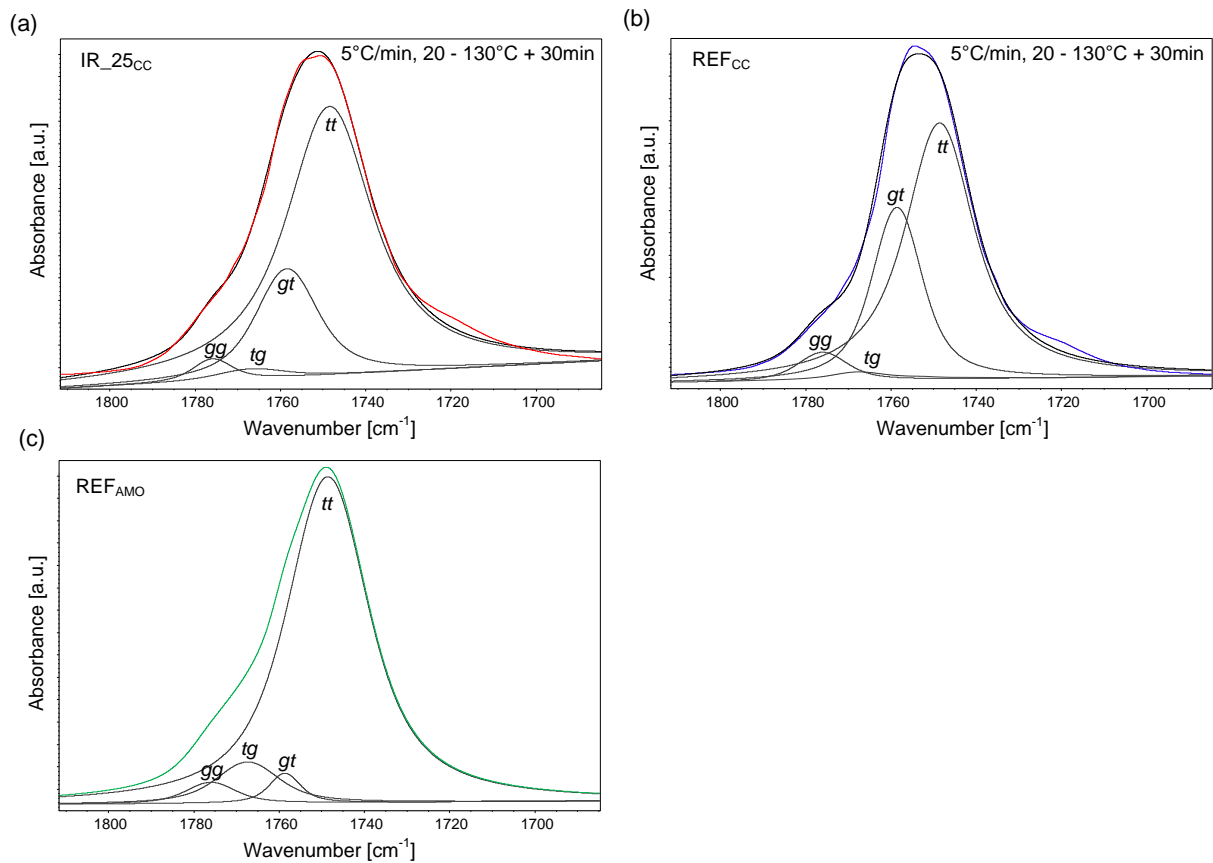

Supplementary Figure S8. Deconvolution of C=O stretching spectral region: a) cold crystallized sample with filamentary modifications IR<sub>25</sub>; b) cold crystallized reference PLLA sample; c) amorphous reference sample. The position of peaks are following: *tt* (1749 cm<sup>-1</sup>), *gt* (1759 cm<sup>-1</sup>), *tg* (1767 cm<sup>-1</sup>), *gg* (1776 cm<sup>-1</sup>)

Obtained spectra of carbonyl stretching region correlate with changes observed in 922 cm<sup>-1</sup> region. The reference sample reveals greater fraction of *gt* component in relation to *tt* component what indicates higher crystalline phase perfection. Amorphous sample has mainly *tt* component and greater *tg* component.
